# Supplementary material for: Cohort effects in dynamic models and their impact on vaccination programmes: an example from Hepatitis A
Source: PubMed Central journal article supplement (PMC1702544; doi:10.1186/1471-2334-6-174), 2006-12-05
Supplement: 1471-2334-6-174-S1.pdf [file 1471-2334-6-174-S1.pdf]

## Additional File 1. Model Equations

The ordinary differential equations that govern the time evolution of state variables ( $S_i$ ,  $E_i$ ,  $I_i$ ,  $R_i$ ,  $V_i$ ) during each year are:

$$\begin{aligned}
 \frac{dS_i}{dt} &= -S_i \sum_{j=1}^7 \beta_{ij} I_j / N_j - \tau_i S_i - g_i + fV_i \\
 \frac{dE_i}{dt} &= S_i \sum_{j=1}^7 \beta_{ij} I_j / N_j + \tau_i S_i - \delta E_i \\
 \frac{dI_i}{dt} &= -\gamma_i I_i + \delta E_i \\
 \frac{dR_i}{dt} &= \gamma_i I_i \\
 \frac{dV_i}{dt} &= g_i - fV_i
 \end{aligned} \tag{A1}$$

where  $f$  is the mean rate at which vaccinated individuals lose their immunity (equivalently,  $1/f$  is the mean duration of vaccine-derived immunity);  $\delta$  is the mean rate at which exposed individuals become infectious (equivalently,  $1/\delta$  is mean latent period);  $\gamma_i$  is the rate at which infected individuals in age class  $i$  recover to a state of lifelong immunity (equivalently,  $1/\gamma_i$  is mean infectious period for individuals in age class  $i$ );  $\varepsilon$  is the vaccine efficacy;  $g_i$  is the rate at which individuals in age class  $i$  are vaccinated;  $\beta_{ij}$  is the rate at which a susceptible in age class  $i$  becomes infected by contact with infectious individuals in age class  $j$  in Canada, and  $\tau_i$  is the rate at which a susceptible in age class  $i$  becomes infected through contact with infectious individuals while travelling overseas. At the end of each year, individuals of a given age  $y$  (where  $y$ , an integer, is the age in years) are moved to the next age  $y+1$ . If  $y = 4, 9, 19, 29, 39$ , or  $59$ , they will also move into the next highest age class. Each year, new individuals are born susceptible in the lowest age,  $y=0$ .
